1 **Targeted Deletion of Vitamin D receptor Gene in Mammalian Cells by**

2 **CRISPR/Cas9 Systems**

3 Tao Zhang<sup>1,2</sup>, Ling Wang<sup>1,2</sup>, Kun Xu<sup>1</sup>, Chonghua Ren<sup>1</sup>, Zhongtian Liu<sup>1</sup>, Zhiying Zhang<sup>1#</sup>

1.College of Animal Science & Technology, Northwest A&F University, Yangling, Shaanxi, People's Republic of China,

2.School of Bioscience and Engineering, Shaanxi University of Technology, Hanzhong, Shaanxi, People's Republic of China

4 # The corresponding author: zhangzhy@nwsuaf.edu.cn

5

6

7

8

9

10

11

12

13

14

15

16

17

18

19

## 1 **Abstract**

2 CRISPR/Cas9 system has become a new versatile technology for genome engineering. It  
3 utilizes a single guide RNA (sgRNA) to recognize target sequences in genome function, and  
4 activates Cas9 endonucleases to cut the locus. In this study, we designed two target sites from  
5 conserved regions of vitamin D receptor (*VDR*) gene in mammalian cells, which cover more  
6 than 17 kb of chromosome region depending on the species. The efficacy of single sgRNA  
7 mediated gene specific modification was about 22% to 36%. Concurrently, targeted deletions  
8 of the intervening genomic segments were generated in chromosomes when the two sgRNAs  
9 worked simultaneously. The large genomic DNA segments ranging from 17.8Kb to 23.4 Kb  
10 could be precisely deleted in human and mouse chromosomes. Furthermore, the expression  
11 level of 24-hydroxylase (*CYP24A1*) regulated by VDR was significantly increased in cells  
12 treated with *VDR* CRISPR/Cas9 vectors. This study showed that CRISPR/Cas9 system can be  
13 employed to generate large genomic segment deletions in different species, providing  
14 sgRNAs are designed within conserved regions.

15 **Keywords:** Vitamin D receptor, target editing, large fragment deletion, CRISPR/Cas9

16

17

18

19

20

21

22

23

24

25

26

27

28

---

## 1      **Introduction**

2            Vitamin D mediates a variety of biological functions such as calcium homeostasis,  
3 calcium reabsorption in the kidney, calcium mobilization in bone, cell differentiation and  
4 proliferation to many target tissues(DeLuca 2004). Most, if not all, the biological actions of  
5 vitamin D are believed to be exerted through the vitamin D receptor (VDR)-mediated control  
6 of target genes (Germain et al. 2006; Morrison et al. 1989). VDR is a member of the nuclear  
7 hormone receptor super-family of transcription factors that regulate gene expression in a  
8 ligand-dependent manner(Mangelsdorf et al. 1995). Mutations in the *VDR* cause the disease  
9 known as hereditary vitamin D resistant rickets (HVDRR) (Malloy et al. 1999). Through  
10 DNA microarray technology, 95 genes were identified that displayed different changes of  
11 expression level in *VDR* null mice, of which 28 genes were up-regulated and 67 were  
12 down-regulated (Li et al. 2003). Using whole body *VDR*<sup>-/-</sup> mice, Claudin2 (*CLDN2*) gene had  
13 been demonstrated to be a direct target of the transcription factor VDR in cultured human  
14 intestinal epithelial cells(Zhang et al. 2015). *VDR* has been previously considered to regulate  
15 key steps in the hair cycle, and it has already been shown that mutations in *VDR* cause  
16 alopecia in humans and mice (Malloy et al. 2009). However, the complete profile of *VDR*  
17 action is still unknown, and precise targeted editing of *VDR* is critical to understanding the  
18 biological functions of *VDR*, which could be the key to development of novel therapeutic  
19 modalities for *VDR*-related diseases.

20            Targeted genomic editing is a powerful technology in revealing gene functions, gene  
21 therapy of human genetics for human diseases, generation of models and breeding animals  
22 with desired traits. Based on naturally occurring spontaneous homologous recombination,  
23 transgenic mice were generated via designed vectors with large homology arms (Norman  
24 1995; Walters 1992). However, target efficiency was extremely low in the presence of  
25 targeted vector in other mammalian cells. Thus, this technology cannot be widely applied in  
26 other animals besides mice. It was illustrated that the introduction of DNA double-strand  
27 break (DSB) could trigger the efficiency of homologous recombination significantly in cells  
28 (Wyman and Kanaar 2006). Generally, endonucleases have the ability to generate DSB in  
29 specific DNA sequences. Nevertheless, the target site recognized by a natural endonuclease is  
30 not unique in genomic sequences. Thus, artificial nucleases were designed to cleave a specific  
31 DNA sequence, and generate a unique DSB in target cell genome. In recent years, several  
32 target genome-editing technologies have been developed and efficiently edited genomes in  
33 various types of cells and organisms. Zinc-finger nucleases (ZFNs) were the first generation

1 artificial nuclease to be widely applied in insects, plants and animals (Remy et al. 2010).  
2 Another efficient genome targeting modification tool is transcription activator-like effector  
3 nucleases (TALENs), which offer far more attractive advantages in comparison to ZFNs, and  
4 have been rapidly and widely used to perform precise genome editing in a variety of  
5 organisms and cell types.

6 A novel genome editing platform based on clustered regularly interspaced short  
7 palindromic repeats(CRISPR)/CRISPR associated (Cas) protein system provides adaptive  
8 immunity against viruses and plasmids in bacteria and archae (Horvath and Barrangou 2010;  
9 Wiedenheft et al. 2012). The type II CRISPR/Cas9 of *Streptococcus pyogenes* is a relatively  
10 simple CRISPR/Cas system, and only involves a single effector enzyme to cleave dsDNA.  
11 Given this advantage, it has rapidly been developed into a viable genome editing tool (Jinek et  
12 al. 2012). CRISPR/Cas9 nuclease is distinct from ZFNs and TALNEs, and it mediates  
13 genome editing following the rule of targeted DNA recognizing and cleavage by designed  
14 short guide RNAs (gRNA) recognizing target and endonuclease Cas9, respectively. Since the  
15 emergence of CRISPR/Cas9, scientists have devoted their efforts to promulgate the use of  
16 CRISPR/Cas9 system on the basis of facilitation of genome editing in mammalian cells.  
17 Zhang Feng achieved this goal, and developed a plasmid that contained both hspCas9  
18 nuclease and a functional gRNA (Ran et al. 2013). Since then, the CRISPR/cas9 nuclease has  
19 become a dominant genome editing platform, and has been successfully used to generate  
20 target gene modified cells in plants and animals (Mali et al. 2013; Nemudryi et al. 2014;  
21 Bortesi and Fischer 2015; Tu et al. 2015).

22 In this study, we designed and constructed CRISPR/Cas9 nuclease to cut two target sites  
23 in the conserved sequences of *VDR*. The target sequences are exactly the same between  
24 humans and mice, and we aimed to use one target vector to achieve *VDR* targeted  
25 modification in 293T and C2C12 cell lines. Additionally, the target efficiency of  
26 CRISPR/Cas9 system on conserved sites was evaluated and compared in different cell types.  
27 This study displayed that CRISPR/ Cas9 system induced high rate mutations at two target  
28 sites of *VDR* in both mouse and human cell lines, and achieved large fragment deletion in  
29 respective chromosomes

## 1 **Materials and Methods**

### 2 **Construction of CRISPR/Cas9 target vector and reporter vector**

3 The sgRNA-Cas9 co-expression plasmid pX330-U6-chimeric-dBsaI-CBh-hspCas9 as  
4 parent vector was obtained from Addgene (<http://www.addgene.org/>), which harbors two  
5 different sticky ends by BsaI digestion (Cong et al. 2013). To construct VDR target vectors,  
6 the target dsDNA with sticky ends were generated via direct annealing of two  
7 oligonucleotides VDRT1F and VDRT1R (Table 1), in which sticky ends sequences exactly  
8 match BsaI ends in Cas9 parent vector. Thus, VDRT1 was cloned into the parent vector  
9 between two BsaI sites. Subsequently, sequencing was performed with U6F primer to  
10 confirm VDRT1 target vector, designated pX330-U6-VDRT1-CBh-hspCas9. Meanwhile,  
11 pX330-U6-VDRT2-CBh-hspCas9 as VDRT2 target vector was obtained with the same  
12 strategy.

13 pCAG-puro-NB-T2A-EGFP backbone plasmid was used to construct CRISPR/Cas9  
14 reporter vector, in which puromycin resistant gene ( $Puro^R$ ) was separated by NotI and  
15 BamHI enzyme sites flanking with two 200bp direct repeats of  $Puro^R$ . In order to insert *VDR*  
16 target sites into backbone plasmid, two oligonucleotides for each target were designed and  
17 synthesized (**Table 2**), and target DNA fragments harboring PAM sequence and NotI and  
18 BamHI sticky ends were generated by direct annealing. Then *VDR* target fragments were  
19 cloned into pCAG-puro-NB-T2A-EGFP between NotI and BamHI sites to achieve two  
20 reporter plasmids, designated pCAG-puro-VDRT1-T2A-EGFP and  
21 pCAG-puro-VDRT2-T2A-EGFP, respectively.

### 22 **Cell culture and transfection**

23 HEK293T (human embryonic kidney cell line) and C2C12 (mouse myoblast cell line)  
24 cells were obtained from the American Tissue Collection Center (ATCC). These two cell  
25 lines were cultured in DMEM (Dulbecco's modified Eagle's medium; Gibco) supplemented  
26 with 10% fetal bovine serum and 1% penicillin/streptomycin, and were maintained at 37°C  
27 and 5%CO<sub>2</sub>. The 293T and C2C12 cells were transfected using NeoFect™ DNA transfection

1 reagent (Neofect biotech, Beijing). According to manufacturer's instructions, 2 $\mu$ g Cas9  
2 expression vector and 1 $\mu$ g report vector were added into each cell culture of 6-well plates. At  
3 48 hour post-transfection, puromycin enrichment was launched to enrich cells containing  
4 restored *puro*<sup>R</sup> in the reporter vector. After 48 hours for puromycin treatment, cells were  
5 maintained in a fresh medium without puromycin for 24 hours, and then the genomic DNA  
6 was extracted for PCR.

### 7 **Genomic DNA isolation and PCR detection**

8 Total genomic DNA was extracted from human 293T cell and mouse C2C12 cell  
9 according to the phenol-chloroform procedure (Malumbres et al. 1997). The target and off  
10 target regions were amplified by PCR with Taq DNA polymerase (Fermentas Inc) according  
11 to the manufacturer's instructions. Using 50-100ng of genomic DNA as template, the cycling  
12 program was 95 $^{\circ}$ C for 5 minutes followed by 35 cycles of 94 $^{\circ}$ C for 30 seconds, 55 $^{\circ}$ C for 30  
13 seconds, and finally 72 $^{\circ}$ C for 30 seconds. Primers used for PCR were listed in table 3.

### 14 **T7 Endonuclease I (T7E1) assay**

15 T7E1 assay was performed as previously described (Kim et al. 2009; Ran et al. 2013).  
16 PCR products were briefly purified using a DNA purification kit (Hangzhou Bioer  
17 Technology Co.,Ltd.). Subsequently, purified products were denatured by heating (for 2 min  
18 at 94  $^{\circ}$ C) and annealing (94  $^{\circ}$ C to 85  $^{\circ}$ C at 2  $^{\circ}$ C per second, 85  $^{\circ}$ C to 25  $^{\circ}$ C at 0.1  $^{\circ}$ C per second),  
19 followed by digestion with the mismatch-sensitive T7 endonuclease I (**NEB**) and then  
20 analyzed using 2% agarose gel electrophoresis.

### 21 **Deletion frequencies of large fragment by digital PCR**

22 Genomic DNA of target cells were serially gradient diluted in double distilled water to  
23 the gradient concentrations of 100ng, 33ng, 10ng, 3.3ng, 1ng, 330pg, 100pg, 33pg, 10pg ,  
24 3.3pg and 1pg. Theoretically, 3.3pg ( $[3.0 \times 10^9 \text{ bp} \times 650 \text{ g/mol/bp}] / 6.0 \times 10^{23}$ ) of genomic  
25 DNA per reaction was considered to be equivalent to "a haploid genome".(He et al. 2015;  
26 Flores et al. 2007) Control PCR was carried out by using the primers of wild-type genes to  
27 confirm this gave target PCR products at a dilution containing 3.3pg DNA reaction. In fact,

1 the target PCR product rose at a dilution containing 10 pg of DNA per reaction, and no PCR  
2 product was observed at the concentration of 3.3pg of DNA. To calculate the deletion  
3 frequencies, 11 wild-type gene reactions and 11 target fragment reactions were performed by  
4 related primers in parallel at each dilution point, respectively. The lowest concentration of  
5 genomic DNA that gave rise to PCR products was determined and used to estimate deletion  
6 frequencies.

### 7 **RNA isolation and Real-time RT- PCR**

8 Total RNA was extracted from target cells via Trizol reagent (TaKaRa, Dalian China).  
9 The first-strand cDNA was generated using a reverse transcription kit (TaKaRa) with random  
10 primers. Real-time quantitative PCR was performed in triplicate samples using a SYBR green  
11 kit (Invitrogen, Thermo Fisher) on the AB Step one plus system. Human *GAPDH* was taken  
12 as the reference gene. The  $2^{-\Delta\Delta CT}$  algorithm was employed to estimate the relative  
13 expression level of each gene. The sequences of primers were listed in Table 3.

### 14 **Target sequencing and sequence alignment**

15 The purified PCR products of target DNA were cloned into the T-vector using the  
16 pGEM-T Kit (Promega). For each target site, 10 independent colonies were chosen for  
17 sequencing detection using the T7F primer by ABI 3130 automated sequencer  
18 (**BeijingAuGCTCo.,Ltd**). DNA sequence alignment was performed to compare *VDR* target  
19 locus with wild-type sequence.

## 20 **Results**

### 21 **Design and construction of CRISPR/Cas9 system for *VDR* editing**

22 *VDR* is located on human chromosome 12 and mouse chromosome 15, respectively. To  
23 achieve target knockout *VDR* in human and mouse cells, *VDR* sequences of humans and mice  
24 were analyzed to choose two target sites in the conserved region in both human and mouse  
25 genomes. According to the design principle and program of CRISPR/cas9  
26 (<http://crispr.mit.edu/>, Zhang Feng Lab), we designed two target sgRNAs (VDRT1 and  
27 VDRT2), which respectively target exon 4 and exon 7 of *VDR* in human genome and exon 3

---

1 and exon 7 of the mouse orthogonal gene. The two target sites are separated by 23.4kb DNA  
2 fragment in human genome and 17.8 kb in mouse genome (Fig.1A). Therefore, we  
3 constructed sgRNA and Cas9 protein co-expression vectors  
4 pX330-U6-VDRT1-CBh-hspCas9 and pX330-U6-VDRT2-CBh-hspCas9 for targeting VDR  
5 gene in both human and mouse culture cells.

6 In order to enrich genetically modified cells, we designed and established a screening  
7 system (Fig.1B) based on reporter plasmid that could be used to test the transfection  
8 efficiency of CRISPR/Cas9 target vectors and enrich target cells simultaneously. In this  
9 reporter vector, DsRed gene was used to detect the transfection efficiency, and puromycin  
10 resistant gene (Puro<sup>R</sup>) and eGFP were used as reporter genes to validate cleavage activity and  
11 enrich positive cells. To simulate target sites in genomes, Puro<sup>R</sup> was separated by the target  
12 DNA fragment with PAM sequences flanking two 200bp direct repeats, and therefore, this  
13 insertion disrupts its open reading frame. Once designed CRISPR/Cas9 cut the target  
14 sequence in the reporter plasmid, the Puro<sup>R</sup> gene was repaired by SSA-mediated DNA repair  
15 mechanism to restore wild-type Puro<sup>R</sup>, and provided the target cells the ability to survive  
16 under puromycin selection pressure in medium. Conversely,, cells without restored Puro<sup>R</sup>  
17 gene were unable to survive in puromycin medium. Therefore, cells with *VDR*  
18 targeted-modification were enriched.

### 19 **Cleavage efficiency of each VDRT sgRNA in HEK293T and C2C12cells**

20 In order to test the cleavage efficiency of CRISPR/Cas9 on target sites in conserved  
21 sequence of *VDR*, CRISPR/Cas9 expression vectors and their corresponding report plasmids  
22 were co-transfected into human 293T cells. After transfection 24h, Red fluorescence and  
23 green fluorescence positive cells were observed (Fig. 2A). Meanwhile, puromycin was added  
24 into the medium for screening and enrichment of positive clones for 48h, and cells were  
25 harvested to extract total genome DNA for further analysis. CRISPR/Cas9-induced *VDR*  
26 indels were measured using T7 endonuclease I (T7E1), which cleaves heteroduplexes formed  
27 by the hybridization of mutant and wild-type *VDR* target sequences or two different mutant  
28 sequences. The mutation frequencies of the two *VDR* sites in 293T cells were 36% and 31%,



---

1 respectively (Fig. 2B). In addition, the mutation frequencies of the VT1 and VT2 sites in  
2 enriched C2C12 cells were 26% and 22% by T7E1 assay.

3 To further confirm the mutation frequency induced via CRISPR/Cas9, we cloned the  
4 PCR product surrounding the target sites amplified from these enriched cells. Ten clones from  
5 each human VDRT1 and VDRT2 sites were randomly picked for direct DNA sequencing.  
6 The sequencing results demonstrated that random indels were detected in 4 colonies of  
7 VDRT1 and 2 colonies of VDRT2, respectively (Fig.3A and B). Deletion of 9nt was observed  
8 in two independent colonies of VDRT1, though 7nt deletion was verified in only 1 colony.  
9 Additionally, 44nt insertion was also found in VDRT1. By comparison, only deletions of 1 nt  
10 and 4nt were detected in VDRT2 site. However, mutations from twenty clones were not  
11 observed at VDRT1 and VDRT2 in mouse C2C12 cells.

### 12 **Highly efficient large fragment deletion in *VDR* using CRISPR/Cas9**

13 After verifying each single sgRNA activity on VDRT1 and VDRT2 target sites, we  
14 contemplated whether we could delete the large chromosome segment between VDRT1 and  
15 VDRT2 sites by co-transfecting plasmids expressing two sgRNAs in addition to Cas9. We  
16 examined the efficiency of deleting the large chromosome segment in both human and mouse  
17 cells. One pair of primers, VDRT1PF and VDRT2PF, which are located upstream of the  
18 VDRT1 site and downstream of the VDRT2 site respectively, was used to amplify *VDR*  
19 chromosome DNA. If a large DNA fragment had been deleted from the chromosome, a 500bp  
20 DNA fragment was amplified. Otherwise, no product could be amplified when wild-type  
21 chromosomes were used as templates. After being enriched with puromycin for 72h, the  
22 transfected cells were harvested and the genomic DNA was prepared for PCR amplification.  
23 As shown in Fig 4A, we detected roughly 500bp PCR products using primers VDRT1PF and  
24 VDRT2PF from Cas9 treated cell genome DNA, and no products were obtained using  
25 wild-type cell genomes as templates (Fig.4A).

26 Furthermore, deletion efficiency was measured via gradient dilution assay. In this assay,  
27 gradient dilution genomic DNA samples were used as a template for PCR to detect the target  
28 fragment and a wild-type gene. PCR products from each dilution point would be revealed by

1 gel electrophoresis. In this study, the positive PCR products of wild-type gene were detected  
2 up to the concentration of 3.3ng genome DNA reaction, and the target fragments of large  
3 fragment deletion *VDR* gave positive PCRs up to the dilution containing 33ng of DNA  
4 (Fig.4B). Therefore, the frequencies of large fragment deletions reached 10% at *VDR* locus in  
5 human cells. Subsequently, PCR products sequencing results confirmed a 23.4Kb deletion  
6 in human and 17.8Kb deletions in mouse chromosomes, respectively. Compared with  
7 wild-type sequences, truncated *VDR* target sites and random indels were observed between  
8 *VDR1* and *VDR2* target sites in both human and mouse chromosomes (Fig.4 C).

### 9 **Expression levels of *VDR* and *Cyp24A1* in the target cells**

10 We analyzed the expression level of *VDR* and 24-hydroxylase (*Cyp24A1*) to detect the  
11 effect of *VDR* target deletion in 293T cells. The *CYP24A1* enzyme catalyzes the first step in  
12 the catabolic pathway, converting  $1\alpha,25(\text{OH})_2\text{D}_3$  into the less active intermediate  
13  $1,24,25(\text{OH})_3\text{D}_3$  (Haussler et al. 1998). The *CYP24A1* gene is significantly up-regulated by  $1\alpha,$   
14  $25(\text{OH})_2\text{D}_3$  through two VDRE in the proximal promoter region (Armbrecht et al. 1998;  
15 Chen and DeLuca 1995). The results show that the mRNA level of *VDR* was significantly  
16 increased in cells treated with T1 and T2 sgRNA compared with the control, and the  
17 expression level of *VDR* decreased in cells transfected with both T1 and T2 sgRNAs.  
18 However, the mRNA levels of *CYP24A1* significantly decreased in all groups treated with  
19 *VDR* sgRNA compared with the control group (Fig.5). The results demonstrated that  
20 CRISPR/Cas9 modified *VDR* could impact its relative gene expression in mammalian cells.

### 21 **Off-targeting detection of CRISPR/cas9 in human 293T cell and mouse C2C12**

22 CRISPR/Cas9 system has become a newly developed, powerful tool for targeted genome  
23 editing. However, high target efficiency was accompanied by high off-targeting effects, a  
24 finding consistent with reports from other studies. Compared with ZFNs and TALENs, the  
25 rate of off-target cleavage via CRISPR/Cas9 could be higher, because only 20bp recognition  
26 sequence of each CRISPR/Cas9 is shorter than target sequences of a pair of ZFNs and  
27 TALENs. Many researches revealed that CRISPR/Cas9 had unexpected off-target effects in  
28 culture cells and several organisms (Fu et al. 2013; Pattanayak et al. 2013; Cradick et al.

1 2013). In addition, the off-target sites were much more similar with target sites, when target  
2 DNA sequences contained insertions ('DNA bulge') or deletions ('RNA bulge') compared to  
3 the RNA guide strand, and these genomic sites could be cleaved by CRISPR/Cas9  
4 systems(Lin et al. 2014). In order to evaluate off-targeting effects of these CRISPR/Cas9  
5 nucleases, we chose two candidate loci for each target site with high potential cleavage in  
6 human and mouse genomes via the program of CRISPR/cas9 (<http://crisp.potential>  
7 [off-target.mit.edu/](http://off-target.mit.edu/), Zhang Feng Lab) [Table 4]. Through T7E1 assay, the results showed the  
8 pX330-U6-VDRT1-CBh-hspCas9 plasmid induced off-target mutations at two potential  
9 off-target sites HVOT1 and HVOT2 with frequencies 8% and 6% in HEK293T cells. No  
10 mutations were detected in mouse C2C12 cells however. In addition, no obvious off-target  
11 effect was detected from pX330-U6-VDRT2-CBh-hspCas9 at the other four off-target sites in  
12 human or mouse genomes (Fig. 6). These results suggest that CRISPR/Cas9 could induce  
13 mutations at some sites in chromosomes, but the specific sgRNA could avoid or reduce the  
14 off-target effect in genome editing research.

## 15 **Discussion**

16 CRISPR/Cas9 nucleases are powerful tools for precise genomic editing in various  
17 species, which have greatly simplified the process of constructing target vectors and have  
18 simultaneously enabled low-cost access of this system to the entire field of biomedical  
19 research. In our study, we presented the CRISPR/Cas9 system effectively modified conserved  
20 sequences in human and mouse *VDR* with relatively high efficiency. *VDR* specific sites  
21 editing cell lines or model animals could be widely used in *VDR* biologic function exploring,  
22 *VDR* relative diseases research and novel medication development. Hereby, we engineered  
23 two CRISPR/Cas9 nucleases, which targeted VDRT1 and VDRT2 sites and successfully  
24 modified *VDR* in both human and mouse cells. To achieve much more nuclease-targeted cells,  
25 a dual-gene report system was employed to screen and enrich genetically modified cells.

26 Except PAM sequences, target sites in human and mouse genomes are identical. By  
27 comparison, it is easy to understand that the efficiency of CRISPR/Cas9 varied greatly

---

1 between VDRT1 and VDRT2 sites in HEK293T cells as well as C2C12 cells. CRISPR/Cas9  
2 induced VDRT1 mutation efficiency via NHEJ in 293T cell was 36%, which was much  
3 higher than the mutation rate in C2C12 cells (26%). Meanwhile, CRISPR/Cas9 mediated  
4 VDRT2 modified efficiency was 30% and 21% in human and mouse cells, respectively.  
5 Obviously, these nucleases worked far more efficiently in human 293T cells than mouse  
6 C2C12 cells. We speculated that different positions of *VDR* target sites in human and mouse  
7 chromosome might affect CRISPR/Cas9 cleavage activities. Thus, these results suggest that  
8 chromosomal structure might play an important role in regulation of CRISPR/Cas9 activity.

9 Another reasonable factor for this phenomenon is the difference of PAM sequences for  
10 identical sites in HEK293T and C2C12 cell lines, in which TGG as PAM sequence for  
11 VDRT1 and VDRT2 in human genome, and GGG and CGG PAM sequences for VDRT1 and  
12 VDRT2 in mouse genome. Though we cannot confidently conclude that the cleavage effect  
13 mediated by TGG PAM sequence was higher than GGG or CGG, our results indicate that  
14 PAM sequences may play a critical role in the activity of CRISPR/Cas9 system.

15 In this study, there were any mutant alleles in 20 clones of mouse *VDR* target, but the  
16 results of the T7E1 assay indicate that *VDR* alleles were mutated in cultured mouse cells. We  
17 thought that three reasons should be consider: firstly, the plasmid transfection efficiency  
18 was very low in mouse cells, and the positive mouse cells were very limited by enrichment.  
19 Secondly, T7E1 assay is a direct and coarse approach in mutation detection, and the detecting  
20 results may be inconsistent with the sequencing. Another, the “flanking” sequences of target  
21 sites may impact the result from T7E1 assay.

22 Taken the advantage of multiple sites target editing, CRISPR/Cas9 systems greatly  
23 facilitate large DNA fragment deletion in chromosomes (Zhou et al. 2014b). Hereby,  
24 CRISPR/Cas9 nucleases targeting VDRT1 and VDRT2 were introduced into HEK293 and  
25 C2C12 cells together to achieve large fragments deletion in 293T cells and C2C12 cells. And  
26 fragments of 23.4Kb and 17.8Kb between VDRT1 and VDRT2 were deleted in human and  
27 mouse chromosomes, respectively. The efficiency of 23.4 Kb DNA segment deletion in 293T  
28 cells was up high to 10%, which was much higher than deletion of chromosomes in

---

1 *Caenorhabditis elegans* (Chen et al. 2014) and rice (Zhou et al. 2014a). By comparison,  
2 another report demonstrated that the efficiency of 65 Kb large DNA fragment deletion was as  
3 high as 11.8% in mouse embryonic stem cells via microinjection of CRISPR/Cas9 expression  
4 plasmids. According to sequencing results, the breakpoint junctions indicated that  
5 CRISPR/Cas9 mediated DSBs were repaired by NHEJ mechanism, a  
6 noticeable disparity compared with the NHEJ repairing DSBs induced by ZFN and TALENs  
7 (Kim et al. 2013). It is likely that Cas9 has the characteristic of cleavage DNA between the  
8 third and fourth base pairs in the upstream of the PAM and generates blunt ends (Jinek et al.  
9 2012), and the ligation of two blunt DNA ends may not require a micro-homology alignment  
10 process.

11 Off-target mutations and chromosomal translocations could lead to adverse biological  
12 effects, such as gene mutation, inactivation of tumor suppressors, and activation of oncogenes.  
13 Previous studies reported that high off-target effects were detected in the whole genome,  
14 especially in cultured cell lines. Recently, several groups revealed that off-target cleavage of  
15 CRISPR/Cas9 occurred at some genomic sites that differ with up to five nucleotides from the  
16 target sites (Pattanayak et al. 2013). In this study, eight potential off-target loci were selected  
17 to detect off-target efficiency. At two potential off-target sites HVOT1 and HVOT2, we  
18 detected off-target mutations at frequencies 8% and 6% via T7E1 assay in HEK293T cells,  
19 respectively. At the other six potential off-target sites, no mutations were detected in human  
20 or mouse genomes (Fig.6). Due to the poor sensitivity of T7E1 assay, it cannot detect  
21 off-target mutations that occur at frequencies <1%(Kim et al. 2009). By contrast, deep  
22 sequencing can measure off-target mutations that occur at frequencies ranging from 0.01% to  
23 0.1%. Thus, the six potential off-target sites should be subject to further evaluation via more  
24 suitable methods.

25 To further analyze the off-target sequences, the two sites with obvious off target effect  
26 all possess AGG PAM motif, and these mismatches were not in the ‘seed sequence’. For the  
27 other six potential off-target sites, some sites have no NGG PAM while some mismatches  
28 were located in the ‘seed sequence’. Previous studies reported that NGG (or CCN on the

---

1 complementary strand) sequences were sufficient for Cas9 targeting and that NGG to NAG or  
2 NNGGN mutations in the editing template should be avoided (Jiang et al. 2013). For  
3 protospacer, the point mutations within the ‘seed sequence’ (the 8 to 10 protospacer  
4 nucleotides immediately adjacent to the PAM) could abolish CRISPR targeting activity. The  
5 distal (from the PAM) positions of the protospacer (12 to 20) could tolerate most mutations  
6 (Semenova et al. 2011; Jinek et al. 2012; Wiedenheft et al. 2011). Thus, our results are  
7 consistent with previous reports, and confirmed this conclusion.

8 For researchers, the appropriate method to reduce off-target effect is the key issue and  
9 top concern in the application of CRISPR/Cas9 system. Scientists have developed various  
10 strategies to construct CRISPR/Cas9 system with low off-target effect. One is to optimize the  
11 CRISPR/Cas9, while the other is to choose specific target sites. In addition, Cas9 was  
12 modified to generate nickases, which introduce single-strand breaks in target sites as well as  
13 off-target loci. Subsequently, single-strand breaks in off-target loci are repaired without any  
14 mutations (Cho et al. 2014). A report indicated that RGEN ribonucleoproteins (RNPs) could  
15 greatly reduce off-target mutations by delivery of purified recombinant Cas9 protein and  
16 guide RNA into cultured human cells (Kim et al. 2014). Furthermore, software has been  
17 developed for assessing the off-target effect in genome editing by CRISPR/Cas9, which is a  
18 critical parameter for screening target sites (Cradick et al. 2014; Xie et al. 2014; Naito et al.  
19 2015; Xiao et al. 2014).

20 One of the main goals of targeted gene modification is to achieve an ideal model for  
21 revealing gene functions. In this study, *VDR* expression levels were significantly different  
22 among these groups, but the expression of *Cyp24A1* decreased efficiently in cells treated with  
23 either a single or double sgRNAs. This phenomenon indicated that CRISPR/Cas9 mediated  
24 mutations of *VDR* diminished its function *in vivo*, which could provide an alternative model  
25 for *VDR* function research. We confused that the levels of *VDR* transcript were increased in  
26 cells transfected with T1 or T2 sgRNA constructs, but decreased in cells co-transfected with  
27 both T1 and T2 sgRNA constructs. We speculate that single site mutation in *VDR* disrupted  
28 the bio-active functions, but an unknown feedback system drove the cells to express more

---

1 *VDR* mRNA. Therefore, levels of *VDR* transcript were increased in cells transfected with T1  
2 or T2 sgRNA constructs. For large fragment deletion cells, the normal expression of *VDR* was  
3 disrupted seriously, thus levels of *VDR* transcript were decreased in cells co-transfected with  
4 both T1 and T2 sgRNA constructs.

5 In summary, CRISPR/Cas9 is an effective genome-editing tool for precise genomic  
6 modification. We constructed CRISPR/Cas9 systems and reporter vectors targeting conserved  
7 sequences of *VDR* in HEK293T cell and C2C12 cell lines. Specific modifications and large  
8 DNA fragment deletion were obtained after the introduction of CRISPR/Cas9 systems. This  
9 study provides a new technology platform for precise gene modification in conserved regions  
10 in different species.

## 11 **Acknowledgments**

12 We wish to thank all of the colleagues in Professor Zhang's lab for their excellent  
13 technical assistance and careful reading of this manuscript. This research was supported by the  
14 National Nature Science Foundation of China. This research was supported by grants from  
15 National Natural Science Foundation of China (NSFC)[31171186, 31402071], National  
16 Science and Technology Major Project of China [2014ZX0801009B] and Natural Science  
17 Basic Research Plan in Shaanxi Province of China [2013JQ3009].

## 18 **References**

19 Armbrrecht, H.J., T.L. Hodam, M.A. Boltz, N.C. Partridge, A.J. Brown *et al.*, 1998 Induction of the  
20 vitamin D 24-hydroxylase (CYP24) by 1,25-dihydroxyvitamin D<sub>3</sub> is regulated by parathyroid hormone in  
21 UMR106 osteoblastic cells. *Endocrinology* 139 (8):3375-3381.

22 Bortesi, L., and R. Fischer, 2015 The CRISPR/Cas9 system for plant genome editing and beyond.  
23 *Biotechnol Adv* 33 (1):41-52.

24 Chen, K.S., and H.F. DeLuca, 1995 Cloning of the human 1 alpha,25-dihydroxyvitamin D-3  
25 24-hydroxylase gene promoter and identification of two vitamin D-responsive elements. *Biochim*  
26 *Biophys Acta* 1263 (1):1-9.

27 Cho, S.W., S. Kim, Y. Kim, J. Kweon, H.S. Kim *et al.*, 2014 Analysis of off-target effects of  
28 CRISPR/Cas-derived RNA-guided endonucleases and nickases. *Genome Res* 24 (1):132-141.



- 
- 1 Cong, L., F.A. Ran, D. Cox, S. Lin, R. Barretto *et al.*, 2013 Multiplex genome engineering using  
2 CRISPR/Cas systems. *Science* 339 (6121):819-823.
- 3 Cradick, T.J., E.J. Fine, C.J. Antico, and G. Bao, 2013 CRISPR/Cas9 systems targeting beta-globin and  
4 CCR5 genes have substantial off-target activity. *Nucleic Acids Res* 41 (20):9584-9592.
- 5 Cradick, T.J., P. Qiu, C.M. Lee, E.J. Fine, and G. Bao, 2014 COSMID: A Web-based Tool for Identifying  
6 and Validating CRISPR/Cas Off-target Sites. *Mol Ther Nucleic Acids* 3:e214.
- 7 DeLuca, H.F., 2004 Overview of general physiologic features and functions of vitamin D. *Am J Clin*  
8 *Nutr* 80 (6 Suppl):1689S-1696S.
- 9 Flores, M., L. Morales, C. Gonzaga-Jauregui, R. Dominguez-Vidana, C. Zepeda *et al.*, 2007 Recurrent  
10 DNA inversion rearrangements in the human genome. *Proc Natl Acad Sci U S A* 104 (15):6099-6106.
- 11 Fu, Y., J.A. Foden, C. Khayter, M.L. Maeder, D. Reyon *et al.*, 2013 High-frequency off-target  
12 mutagenesis induced by CRISPR-Cas nucleases in human cells. *Nat Biotechnol* 31 (9):822-826.
- 13 Germain, P., B. Staels, C. Dacquet, M. Spedding, and V. Laudet, 2006 Overview of nomenclature of  
14 nuclear receptors. *Pharmacol Rev* 58 (4):685-704.
- 15 Haussler, M.R., G.K. Whitfield, C.A. Haussler, J.C. Hsieh, P.D. Thompson *et al.*, 1998 The nuclear  
16 vitamin D receptor: biological and molecular regulatory properties revealed. *J Bone Miner Res* 13  
17 (3):325-349.
- 18 He, Z., C. Proudfoot, A.J. Mileham, D.G. McLaren, C.B. Whitelaw *et al.*, 2015 Highly efficient targeted  
19 chromosome deletions using CRISPR/Cas9. *Biotechnol Bioeng* 112 (5):1060-1064.
- 20 Horvath, P., and R. Barrangou, 2010 CRISPR/Cas, the immune system of bacteria and archaea.  
21 *Science* 327 (5962):167-170.
- 22 Jiang, W., D. Bikard, D. Cox, F. Zhang, and L.A. Marraffini, 2013 RNA-guided editing of bacterial  
23 genomes using CRISPR-Cas systems. *Nat Biotechnol* 31 (3):233-239.
- 24 Jinek, M., K. Chylinski, I. Fonfara, M. Hauer, J.A. Doudna *et al.*, 2012 A programmable  
25 dual-RNA-guided DNA endonuclease in adaptive bacterial immunity. *Science* 337 (6096):816-821.
- 26 Kim, H.J., H.J. Lee, H. Kim, S.W. Cho, and J.S. Kim, 2009 Targeted genome editing in human cells with  
27 zinc finger nucleases constructed via modular assembly. *Genome Res* 19 (7):1279-1288.
- 28 Kim, S., D. Kim, S.W. Cho, J. Kim, and J.S. Kim, 2014 Highly efficient RNA-guided genome editing in  
29 human cells via delivery of purified Cas9 ribonucleoproteins. *Genome Res* 24 (6):1012-1019.
- 30 Kim, Y., J. Kweon, and J.S. Kim, 2013 TALENs and ZFNs are associated with different mutation  
31 signatures. *Nat Methods* 10 (3):185.



- 
- 1 Li, X., W. Zheng, and Y.C. Li, 2003 Altered gene expression profile in the kidney of vitamin D receptor  
2 knockout mice. *J Cell Biochem* 89 (4):709-719.
- 3 Lin, Y., T.J. Cradick, M.T. Brown, H. Deshmukh, P. Ranjan *et al.*, 2014 CRISPR/Cas9 systems have  
4 off-target activity with insertions or deletions between target DNA and guide RNA sequences. *Nucleic  
5 Acids Res* 42 (11):7473-7485.
- 6 Mali, P., L. Yang, K.M. Esvelt, J. Aach, M. Guell *et al.*, 2013 RNA-guided human genome engineering  
7 via Cas9. *Science* 339 (6121):823-826.
- 8 Malloy, P.J., J.W. Pike, and D. Feldman, 1999 The vitamin D receptor and the syndrome of hereditary  
9 1,25-dihydroxyvitamin D-resistant rickets. *Endocr Rev* 20 (2):156-188.
- 10 Malloy, P.J., J. Wang, K. Jensen, and D. Feldman, 2009 Modulation of vitamin d receptor activity by  
11 the corepressor hairless: differential effects of hairless isoforms. *Endocrinology* 150 (11):4950-4957.
- 12 Malumbres, M., R. Mangués, N. Ferrer, S. Lu, and A. Pellicer, 1997 Isolation of high molecular weight  
13 DNA for reliable genotyping of transgenic mice. *Biotechniques* 22 (6):1114-1119.
- 14 Mangelsdorf, D.J., C. Thummel, M. Beato, P. Herrlich, G. Schutz *et al.*, 1995 The nuclear receptor  
15 superfamily: the second decade. *Cell* 83 (6):835-839.
- 16 Morrison, N.A., J. Shine, J.C. Fragonas, V. Verkest, M.L. McMenemy *et al.*, 1989  
17 1,25-dihydroxyvitamin D-responsive element and glucocorticoid repression in the osteocalcin gene.  
18 *Science* 246 (4934):1158-1161.
- 19 Naito, Y., K. Hino, H. Bono, and K. Ui-Tei, 2015 CRISPRdirect: software for designing CRISPR/Cas guide  
20 RNA with reduced off-target sites. *Bioinformatics* 31 (7):1120-1123.
- 21 Nemudryi, A.A., K.R. Valetdinova, S.P. Medvedev, and S.M. Zakian, 2014 TALEN and CRISPR/Cas  
22 Genome Editing Systems: Tools of Discovery. *Acta Naturae* 6 (3):19-40.
- 23 Norman, A.W., 1995 The vitamin D Endocrine system: manipulation of structure-function  
24 relationships to provide opportunities for development of new cancer chemopreventive and  
25 immunosuppressive agents. *J Cell Biochem Suppl* 22:218-225.
- 26 Pattanayak, V., S. Lin, J.P. Guilinger, E. Ma, J.A. Doudna *et al.*, 2013 High-throughput profiling of  
27 off-target DNA cleavage reveals RNA-programmed Cas9 nuclease specificity. *Nat Biotechnol* 31  
28 (9):839-843.
- 29 Ran, F.A., P.D. Hsu, J. Wright, V. Agarwala, D.A. Scott *et al.*, 2013 Genome engineering using the  
30 CRISPR-Cas9 system. *Nat Protoc* 8 (11):2281-2308.
- 31 Remy, S., L. Tesson, S. Menoret, C. Usal, A.M. Scharenberg *et al.*, 2010 Zinc-finger nucleases: a  
32 powerful tool for genetic engineering of animals. *Transgenic Res* 19 (3):363-371.

- 
- 1           Semenova, E., M.M. Jore, K.A. Datsenko, A. Semenova, E.R. Westra *et al.*, 2011 Interference by  
2 clustered regularly interspaced short palindromic repeat (CRISPR) RNA is governed by a seed sequence.  
3 *Proc Natl Acad Sci U S A* 108 (25):10098-10103.
- 4           Tu, Z., W. Yang, S. Yan, X. Guo, and X.J. Li, 2015 CRISPR/Cas9: a powerful genetic engineering tool for  
5 establishing large animal models of neurodegenerative diseases. *Mol Neurodegener* 10:35.
- 6           Walters, M.R., 1992 Newly identified actions of the vitamin D endocrine system. *Endocr Rev* 13  
7 (4):719-764.
- 8           Wiedenheft, B., S.H. Sternberg, and J.A. Doudna, 2012 RNA-guided genetic silencing systems in  
9 bacteria and archaea. *Nature* 482 (7385):331-338.
- 10          Wiedenheft, B., E. van Duijn, J.B. Bultema, S.P. Waghmare, K. Zhou *et al.*, 2011 RNA-guided complex  
11 from a bacterial immune system enhances target recognition through seed sequence interactions. *Proc*  
12 *Natl Acad Sci U S A* 108 (25):10092-10097.
- 13          Wyman, C., and R. Kanaar, 2006 DNA double-strand break repair: all's well that ends well. *Annu Rev*  
14 *Genet*40:363-383.
- 15          Xiao, A., Z. Cheng, L. Kong, Z. Zhu, S. Lin *et al.*, 2014 CasOT: a genome-wide Cas9/gRNA off-target  
16 searching tool. *Bioinformatics*.
- 17          Xie, S., B. Shen, C. Zhang, X. Huang, and Y. Zhang, 2014 sgRNAs9: a software package for designing  
18 CRISPR sgRNA and evaluating potential off-target cleavage sites. *PLoS One* 9 (6):e100448.
- 19          Zhang, Y.G., S. Wu, R. Lu, D. Zhou, J. Zhou *et al.*, 2015 Tight junction CLDN2 gene is a direct target of  
20 the vitamin D receptor. *Sci Rep* 5:10642.
- 21          Zhou, J., B. Shen, W. Zhang, J. Wang, J. Yang *et al.*, 2014 One-step generation of different  
22 immunodeficient mice with multiple gene modifications by CRISPR/Cas9 mediated genome  
23 engineering. *Int J Biochem Cell Biol* 46:49-55.
- 24          Armbrecht, H.J., T.L. Hodam, M.A. Boltz, N.C. Partridge, A.J. Brown *et al.*, 1998 Induction of the  
25 vitamin D 24-hydroxylase (CYP24) by 1,25-dihydroxyvitamin D3 is regulated by parathyroid hormone in  
26 UMR106 osteoblastic cells. *Endocrinology* 139 (8):3375-3381.
- 27          Bortesi, L., and R. Fischer, 2015 The CRISPR/Cas9 system for plant genome editing and beyond.  
28 *Biotechnol Adv* 33 (1):41-52.
- 29          Chen, K.S., and H.F. DeLuca, 1995 Cloning of the human 1 alpha,25-dihydroxyvitamin D-3  
30 24-hydroxylase gene promoter and identification of two vitamin D-responsive elements. *Biochim*  
31 *Biophys Acta* 1263 (1):1-9.
- 32          Chen, X., F. Xu, C. Zhu, J. Ji, X. Zhou *et al.*, 2014 Dual sgRNA-directed gene knockout using  
33 CRISPR/Cas9 technology in *Caenorhabditis elegans*. *Sci Rep* 4:7581.

- 
- 1 Cho, S.W., S. Kim, Y. Kim, J. Kweon, H.S. Kim *et al.*, 2014 Analysis of off-target effects of  
2 CRISPR/Cas-derived RNA-guided endonucleases and nickases. *Genome Res* 24 (1):132-141.
- 3 Cong, L., F.A. Ran, D. Cox, S. Lin, R. Barretto *et al.*, 2013 Multiplex genome engineering using  
4 CRISPR/Cas systems. *Science* 339 (6121):819-823.
- 5 Cradick, T.J., E.J. Fine, C.J. Antico, and G. Bao, 2013 CRISPR/Cas9 systems targeting beta-globin and  
6 CCR5 genes have substantial off-target activity. *Nucleic Acids Res* 41 (20):9584-9592.
- 7 Cradick, T.J., P. Qiu, C.M. Lee, E.J. Fine, and G. Bao, 2014 COSMID: A Web-based Tool for Identifying  
8 and Validating CRISPR/Cas Off-target Sites. *Mol Ther Nucleic Acids* 3:e214.
- 9 DeLuca, H.F., 2004 Overview of general physiologic features and functions of vitamin D. *Am J Clin*  
10 *Nutr* 80 (6 Suppl):1689S-1696S.
- 11 Flores, M., L. Morales, C. Gonzaga-Jauregui, R. Dominguez-Vidana, C. Zepeda *et al.*, 2007 Recurrent  
12 DNA inversion rearrangements in the human genome. *Proc Natl Acad Sci U S A* 104 (15):6099-6106.
- 13 Fu, Y., J.A. Foden, C. Khayter, M.L. Maeder, D. Reyon *et al.*, 2013 High-frequency off-target  
14 mutagenesis induced by CRISPR-Cas nucleases in human cells. *Nat Biotechnol* 31 (9):822-826.
- 15 Germain, P., B. Staels, C. Dacquet, M. Spedding, and V. Laudet, 2006 Overview of nomenclature of  
16 nuclear receptors. *Pharmacol Rev* 58 (4):685-704.
- 17 Haussler, M.R., G.K. Whitfield, C.A. Haussler, J.C. Hsieh, P.D. Thompson *et al.*, 1998 The nuclear  
18 vitamin D receptor: biological and molecular regulatory properties revealed. *J Bone Miner Res* 13  
19 (3):325-349.
- 20 He, Z., C. Proudfoot, A.J. Mileham, D.G. McLaren, C.B. Whitelaw *et al.*, 2015 Highly efficient targeted  
21 chromosome deletions using CRISPR/Cas9. *Biotechnol Bioeng* 112 (5):1060-1064.
- 22 Horvath, P., and R. Barrangou, 2010 CRISPR/Cas, the immune system of bacteria and archaea.  
23 *Science* 327 (5962):167-170.
- 24 Jiang, W., D. Bikard, D. Cox, F. Zhang, and L.A. Marraffini, 2013 RNA-guided editing of bacterial  
25 genomes using CRISPR-Cas systems. *Nat Biotechnol* 31 (3):233-239.
- 26 Jinek, M., K. Chylinski, I. Fonfara, M. Hauer, J.A. Doudna *et al.*, 2012 A programmable  
27 dual-RNA-guided DNA endonuclease in adaptive bacterial immunity. *Science* 337 (6096):816-821.
- 28 Kim, H.J., H.J. Lee, H. Kim, S.W. Cho, and J.S. Kim, 2009 Targeted genome editing in human cells with  
29 zinc finger nucleases constructed via modular assembly. *Genome Res* 19 (7):1279-1288.
- 30 Kim, S., D. Kim, S.W. Cho, J. Kim, and J.S. Kim, 2014 Highly efficient RNA-guided genome editing in  
31 human cells via delivery of purified Cas9 ribonucleoproteins. *Genome Res* 24 (6):1012-1019.
- 32 Kim, Y., J. Kweon, and J.S. Kim, 2013 TALENs and ZFNs are associated with different mutation  
33 signatures. *Nat Methods* 10 (3):185.
- 34 Li, X., W. Zheng, and Y.C. Li, 2003 Altered gene expression profile in the kidney of vitamin D receptor  
35 knockout mice. *J Cell Biochem* 89 (4):709-719.

- 
- 1 Lin, Y., T.J. Cradick, M.T. Brown, H. Deshmukh, P. Ranjan *et al.*, 2014 CRISPR/Cas9 systems have  
2 off-target activity with insertions or deletions between target DNA and guide RNA sequences. *Nucleic*  
3 *Acids Res* 42 (11):7473-7485.
- 4 Mali, P., L. Yang, K.M. Esvelt, J. Aach, M. Guell *et al.*, 2013 RNA-guided human genome engineering  
5 via Cas9. *Science* 339 (6121):823-826.
- 6 Malloy, P.J., J.W. Pike, and D. Feldman, 1999 The vitamin D receptor and the syndrome of hereditary  
7 1,25-dihydroxyvitamin D-resistant rickets. *Endocr Rev* 20 (2):156-188.
- 8 Malloy, P.J., J. Wang, K. Jensen, and D. Feldman, 2009 Modulation of vitamin d receptor activity by  
9 the corepressor hairless: differential effects of hairless isoforms. *Endocrinology* 150 (11):4950-4957.
- 10 Malumbres, M., R. Mangués, N. Ferrer, S. Lu, and A. Pellicer, 1997 Isolation of high molecular weight  
11 DNA for reliable genotyping of transgenic mice. *Biotechniques* 22 (6):1114-1119.
- 12 Mangelsdorf, D.J., C. Thummel, M. Beato, P. Herrlich, G. Schutz *et al.*, 1995 The nuclear receptor  
13 superfamily: the second decade. *Cell* 83 (6):835-839.
- 14 Morrison, N.A., J. Shine, J.C. Fragonas, V. Verkest, M.L. McMenemy *et al.*, 1989  
15 1,25-dihydroxyvitamin D-responsive element and glucocorticoid repression in the osteocalcin gene.  
16 *Science* 246 (4934):1158-1161.
- 17 Naito, Y., K. Hino, H. Bono, and K. Ui-Tei, 2015 CRISPRdirect: software for designing CRISPR/Cas guide  
18 RNA with reduced off-target sites. *Bioinformatics* 31 (7):1120-1123.
- 19 Nemudryi, A.A., K.R. Valetdinova, S.P. Medvedev, and S.M. Zakian, 2014 TALEN and CRISPR/Cas  
20 Genome Editing Systems: Tools of Discovery. *Acta Naturae* 6 (3):19-40.
- 21 Norman, A.W., 1995 The vitamin D Endocrine system: manipulation of structure-function  
22 relationships to provide opportunities for development of new cancer chemopreventive and  
23 immunosuppressive agents. *J Cell Biochem Suppl* 22:218-225.
- 24 Pattanayak, V., S. Lin, J.P. Guilinger, E. Ma, J.A. Doudna *et al.*, 2013 High-throughput profiling of  
25 off-target DNA cleavage reveals RNA-programmed Cas9 nuclease specificity. *Nat Biotechnol* 31  
26 (9):839-843.
- 27 Ran, F.A., P.D. Hsu, J. Wright, V. Agarwala, D.A. Scott *et al.*, 2013 Genome engineering using the  
28 CRISPR-Cas9 system. *Nat Protoc* 8 (11):2281-2308.
- 29 Remy, S., L. Tesson, S. Menoret, C. Usal, A.M. Scharenberg *et al.*, 2010 Zinc-finger nucleases: a  
30 powerful tool for genetic engineering of animals. *Transgenic Res* 19 (3):363-371.
- 31 Semenova, E., M.M. Jore, K.A. Datsenko, A. Semenova, E.R. Westra *et al.*, 2011 Interference by  
32 clustered regularly interspaced short palindromic repeat (CRISPR) RNA is governed by a seed sequence.  
33 *Proc Natl Acad Sci U S A* 108 (25):10098-10103.
- 34 Tu, Z., W. Yang, S. Yan, X. Guo, and X.J. Li, 2015 CRISPR/Cas9: a powerful genetic engineering tool for  
35 establishing large animal models of neurodegenerative diseases. *Mol Neurodegener* 10:35.
- 36 Walters, M.R., 1992 Newly identified actions of the vitamin D endocrine system. *Endocr Rev* 13

- 1 (4):719-764.
- 2 Wiedenheft, B., S.H. Sternberg, and J.A. Doudna, 2012 RNA-guided genetic silencing systems in  
3 bacteria and archaea. *Nature* 482 (7385):331-338.
- 4 Wiedenheft, B., E. van Duijn, J.B. Bultema, S.P. Waghmare, K. Zhou *et al.*, 2011 RNA-guided complex  
5 from a bacterial immune system enhances target recognition through seed sequence interactions. *Proc*  
6 *Natl Acad Sci U S A* 108 (25):10092-10097.
- 7 Wyman, C., and R. Kanaar, 2006 DNA double-strand break repair: all's well that ends well. *Annu Rev*  
8 *Genet* 40:363-383.
- 9 Xiao, A., Z. Cheng, L. Kong, Z. Zhu, S. Lin *et al.*, 2014 CasOT: a genome-wide Cas9/gRNA off-target  
10 searching tool. *Bioinformatics*.
- 11 Xie, S., B. Shen, C. Zhang, X. Huang, and Y. Zhang, 2014 sgRNAs9: a software package for designing  
12 CRISPR sgRNA and evaluating potential off-target cleavage sites. *PLoS One* 9 (6):e100448.
- 13 Zhang, Y.G., S. Wu, R. Lu, D. Zhou, J. Zhou *et al.*, 2015 Tight junction CLDN2 gene is a direct target of  
14 the vitamin D receptor. *Sci Rep* 5:10642.
- 15 Zhou, H., B. Liu, D.P. Weeks, M.H. Spalding, and B. Yang, 2014a Large chromosomal deletions and  
16 heritable small genetic changes induced by CRISPR/Cas9 in rice. *Nucleic Acids Res* 42  
17 (17):10903-10914.
- 18 Zhou, J., B. Shen, W. Zhang, J. Wang, J. Yang *et al.*, 2014b One-step generation of different  
19 immunodeficient mice with multiple gene modifications by CRISPR/Cas9 mediated genome  
20 engineering. *Int J Biochem Cell Biol* 46:49-55.
- 21

1 Tables

2 Table1. DNA oligos of sgRNA for CRISPR/Cas9 expression plasmids construction

| Name     | Sequences*                       | Note                 |
|----------|----------------------------------|----------------------|
| VDRT1F : | <i>cacc</i> GTGTGTGGAGACCGAGCCAC | For sgRNA/Cas9-VDRT1 |
| VDRT1R : | <i>aaac</i> GTGGCTCGGTCTCCACACAC | For sgRNA/Cas9-VDRT1 |
| VDRT2F : | <i>cacc</i> TACAGCATCCAAAAGGTCAT | For sgRNA/Cas9-VDRT2 |
| VDRT2R : | <i>aaac</i> ATGACCTTTTGGATGCTGTA | For sgRNA/Cas9-VDRT2 |

3 \* Restriction enzyme recognition sequences are in lower-case.

4 Table2. DNA oligos of target site for report vector construction

| Name       | Sequences*                      | Note                      |
|------------|---------------------------------|---------------------------|
| VDR-ReT1F  | ggccgcGTGTGTGGAGACCGAGCCACTGG g | For VDRT1 reporter vector |
| VDR-ReT1R  | GatccCCAGTGGCTCGGTCTCCACACACgc  | For VDRT1 reporter vector |
| VDR-ReT2F: | ggccgcTACAGCATCCAAAAGGTCATTGG g | For VDRT2 reporter vector |
| VDR-ReT2R: | gatccCCAATGACCTTTTGGATGCTGTAgc  | For VDRT2 reporter vector |

5 \* Restriction enzyme recognition sequences are in lower-case. Underlined nucleotides are nucleotides in  
6 the protospacer adjacent motif (PAM) following the 20-ntsgRNA targeting sequence.

7 Table3. PCR primers for target and off target sequences amplification

| Category               | Name       | Sequence               | Note                                                                        |
|------------------------|------------|------------------------|-----------------------------------------------------------------------------|
| For designated targets | HuVDRT1-PF | TGCTTGCTGTTCTTACAGGGAT | For human VDRT1 target sequence and large fragment deletion target sequence |
|                        | HuVDRT1-PR | CAGAGGAACATCTGGAGCTGAG | For human VDRT1 target                                                      |

|                                |               |                         | sequence                                                                    |
|--------------------------------|---------------|-------------------------|-----------------------------------------------------------------------------|
|                                | HuVDRT2-PF    | CAGACATGATGGACTCGTCCAG  | For human VDRT2 target sequence                                             |
|                                | HuVDRT2-PR    | GAGCGAGAATCTGTCTGGAAAA  | For human VDRT1 target sequence and large fragment deletion target sequence |
|                                | MoVDRT1PF     | CGGTGGCTATGCTGAAGGTG    | For mouse VDRT1 target sequence and large fragment deletion target sequence |
|                                | MoVDRT1PR     | GACACGGTGGGACTGAGAAG    | For mouse VDRT1 target sequence                                             |
|                                | MoVDRT2-PF    | CTGGGTGTCCTTAAATAGCTCTC | For mouse VDRT2 target sequence                                             |
|                                | MoVDRT2-PR    | AAGATCTTAGGTGGCCATGAGAC | For mouse VDRT1 target sequence and large fragment deletion target sequence |
| For potential off-site targets | HuVDRT1OT1-PF | AGGGACACAGCACAGGAACAG   | For VDRT1 sgRNA in human genome                                             |
|                                | HuVDRT1OT1-PR | GATGGGAGAAGGACCTCAAAC   | For VDRT1 sgRNA in human genome                                             |
|                                | HuVDRT1OT2-PF | CCTCGCATGTGAACTCGTCCA   | For VDRT1 sgRNA in human genome                                             |
|                                | HuVDRT1OT2-PR | CTCCTCCTTTCTCCTGCTGGT   | For VDRT1 sgRNA in human genome                                             |
|                                | HuVDRT2OT1-PF | TGTCATATACATCCCTCAGCAC  | For VDRT2 sgRNA in human genome                                             |
|                                | HuVDRT2OT1-PR | TTTTCTCTACTGGTGGAGATGG  | For VDRT2 sgRNA in                                                          |

|          |               |                        |                                 |
|----------|---------------|------------------------|---------------------------------|
|          |               |                        | human genome                    |
|          | HuVDRT2OT2-PF | GACTCTCAAGCAATATCTTGGC | For VDRT2 sgRNA in human genome |
|          | HuVDRT2OT2-PR | AACTTCCTGATTCAGTTACCCC | For VDRT2 sgRNA in human        |
|          | MoVDRT1OT1-PF | ACATTTTTGCTTTTAGTGCCGC | For VDRT1 sgRNA in mouse genome |
|          | MoVDRT1OT1-PR | TGTTCTTGACTCTTAGGCTCTG | For VDRT1 sgRNA in mouse genome |
|          | MoVDRT1OT2-PF | TGGTGATGTTGTAACCGGCTTT | For VDRT1 sgRNA in mouse genome |
|          | MoVDRT1OT2-PR | TCCGTAGAAGGAGCTGGAAGTG | For VDRT1 sgRNA in mouse genome |
|          | MoVDRT2OT1-PF | TTCCCTGGCTCCCTCCTAAGT  | For VDRT2 sgRNA in mouse genome |
|          | MoVDRT2OT1-PR | CCTGGTATCTATACATGTGTGG | For VDRT2 sgRNA in mouse genome |
|          | MoVDRT2OT2-PF | GATACTGGTTTCTGAGATGGGG | For VDRT2 sgRNA in mouse genome |
|          | MoVDRT2OT2-PR | TCAATGAGTAACTGGGTCGTGT | For VDRT2 sgRNA in mouse genome |
| For qPCR | VDRF          | ACCTGTGGCAACCAAGACT    | For human <i>VDR</i>            |
|          | VDRR          | TCCACCTGGAACCTTGATG    | For human <i>VDR</i>            |
|          | CYP24A1F      | CTCAAGAAACAGCACGACACCC | For human <i>CYP24A1</i>        |
|          | CYP24A1R      | GCACCGACTCAAAGGAACCC   | For human <i>CYP24A1</i>        |

1 Table 4. The sequences of potential off-target sites in human and mouse



---

| Name        | Sequence*                       | Note                                                   |
|-------------|---------------------------------|--------------------------------------------------------|
| HuVDRT1-OT1 | caGaGTGGAcACCGAGCCAC <u>AGG</u> | The off-sites target1 for VDRT1 sgRNA in human genome  |
| HuVDRT1-OT2 | GaGTGTGcAgACCGAGCCcCa <u>GG</u> | The off-sites target2 for VDRT1 sgRNA in mouse genome  |
| HuVDRT2-OT1 | cACtGCtTCCAAAAGGTCAT <u>caG</u> | The off-sites target1 for VDRT2 sgRNA in human genome  |
| HuVDRT2-OT2 | tACAGCATgCAcAAGGTCAT <u>caG</u> | The off-sites target1 for VDRT2 sgRNA in human genome  |
| MoVDRT1-OT1 | GTGTGTGGAGACCGgGCCACa <u>GG</u> | The off-sites target1 for VDRT1 sgRNA in mouse genome  |
| MoVDRT1-OT2 | GgGTGgGGcGACCGAGCCACaa <u>G</u> | The off-sites target 2 for VDRT1 sgRNA in mouse genome |
| MoVDRT2-OT1 | TAAaAtATCCAAAAGGTCAT <u>aaG</u> | The off-sites target1 for VDRT2 sgRNA in mouse genome  |
| MoVDRT2-OT2 | TACAaCAaCCAAAAGGTCAaaa <u>G</u> | The off-sites target2 for VDRT2 sgRNA in mouse genome  |

---

1 \*PAM is indicated in underline. Nucleotide mismatches between the target sequence and the potential  
2 off-target sequences are in lower-case.

3

---

1 Figure legends

2 Fig.1 Strategy for target editing in human and mouse chromosome and target cells enrich  
3 systems. (A) Schematic diagram of location of two *VDR* targeting sites in human and mouse  
4 chromosomes. The red lines stand for the locations of two target sites in *VDR*, and the  
5 distances between the two target sites and each sequence of target sites are shown. The  
6 primers for the PCR amplified target sites sequence are indicated by a black arrow. (B)  
7 Schematic diagram of reporter vector characteristics. DsRed gene was a reporter gene to test  
8 the transfection efficiency of CRISPR/Cas9 system. During the introduction of CRISPR/Cas9,  
9 the disrupted puromycin resistance gene (Puro<sup>R</sup>) was repaired by single strand annealing  
10 (SSA), resulting in restored PuroR and eGFP.

11 Fig.2 Knockout of *VDR* by CRISPR/Cas9 in human 293T cells and mouse C2C12 cells. (A)  
12 The transfection efficiency and activity of CRISPR/Cas9 in HEK293T cells. (B) The  
13 efficiency of CRISPR/Cas9 mediated cleavage at two target sites in HEK293T cells and  
14 C2C12 cells.

15 Fig.3 CRISPR/Cas9 mediated *VDR* targeted editing in human 293T cells. (A) Targeted  
16 indel mutations via VDRT1 CRISPR/Cas9. (B) Targeted indel mutations by VDRT2  
17 CRISPR/Cas9. Target sequences were highlighted with pink boxes, and PAM sequences were  
18 highlighted as underlined. Green boxes stand for insertion sequences. (▼, deletion junction;  
19 △,deletion; +,insertion)

20 Fig.4 CRISPR/Cas9 mediated large fragment deletion within *VDR* in HEK293T cells and  
21 mouse C2C12 cells. (A) The large fragment deletion was identified by PCR. The PCR  
22 products of lane 3 (+CRISPR/Cas9) and lane 4 (WT-DNA) were amplified from treated cells  
23 and wild type genomic DNA, respectively. The non-relative PCR was performed to confirm  
24 PCR system normal in lane 2. (B) “Digital” PCR products identifying the larger genomic  
25 deletions within the *VDR*. The strong 400bp band in all lanes W1-W11 (on Mark right) is a  
26 non-specific amplification product. The 500bp bands from D1-D11 (on Mark right)  
27 correspond to the expected size of the PCR product in the event of large fragment deletion of  
28 the intervening sequence. (C) The indel mutations were identified by Sanger sequence. Target  
29 sequences were highlighted with red boxes and pink boxes, and PAM sequences were  
30 highlighted as underlined. Green boxes stand for insertion sequences. (▼, deletion junction)

31 Fig.5 Expression levels of *VDR* and *Cyp24A1* different treated cells. The control group  
32 indicated that the cells were treated with no related sgRNA. T1 sgRNA, T2 sgRNA show that  
33 the cells were treated with CRISPR/Cas9 vectors of VDRT1 and VDRT2, respectively. And  
34 T1, T2 sgRNA stands for cells co-transfected with VDRT1 and VDRT2.

35 Fig.6 Detection of CRISPR/Cas9 mediated off-targeting. (A) The off target effect of *VDR*

1 sgRNA1 and sgRNA2 in HEK293T cells. (B) The off target effect of VDR sgRNA1 and  
2 sgRNA2 in C2C12 cells.

3

A

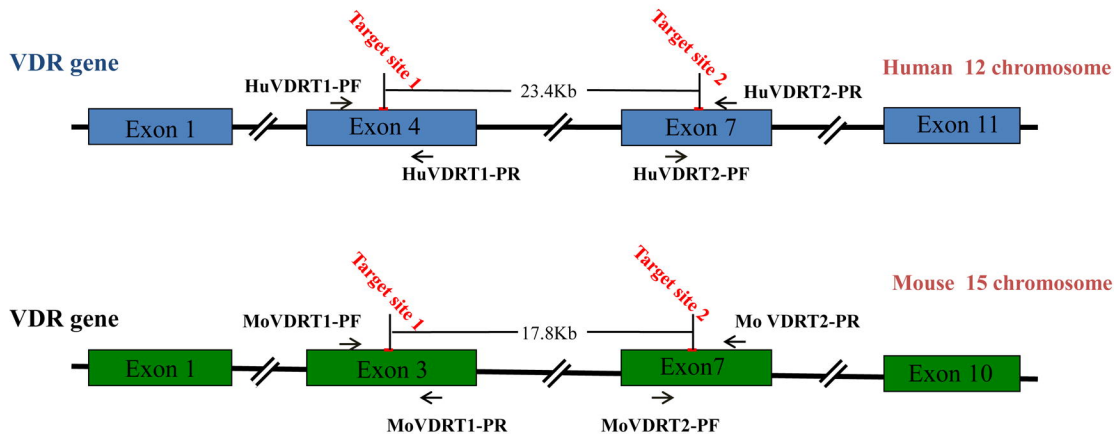

B

Reporter Vector

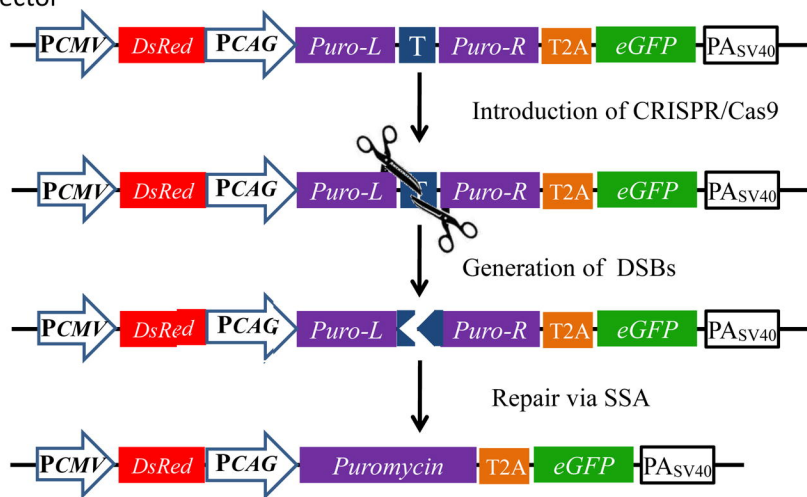

A

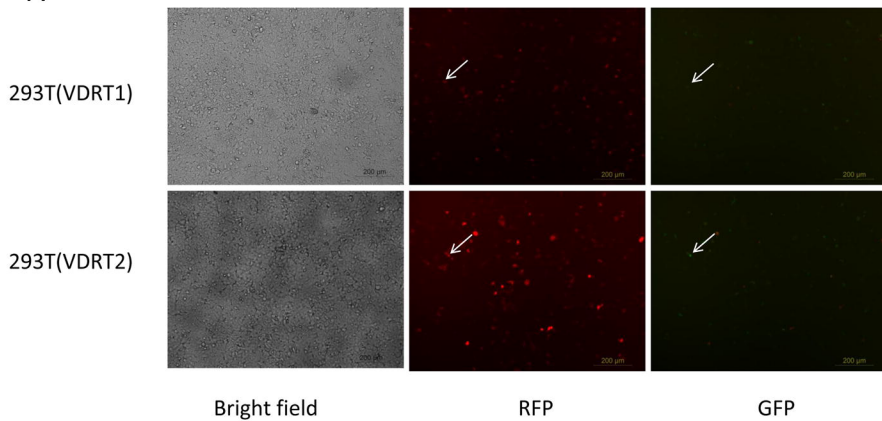

B

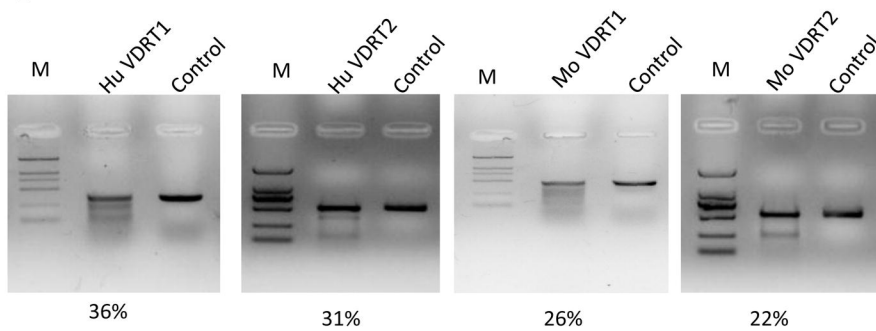

A

*Hu VDR-T1*

GGATCTGGG **CTGTGTGGA GACCGAGCCA CTGG**CTTTCA CTTCAATGCT ATGACCTGTG AAGCTGCAA AGGCTTCTTC (WT)  
 GGATCTGGG **CTGTGTGGA GACCGAGG**-----TTTCA CTTCAATGCT ATGACCTGTG AAGCTGCAA AGGCTTCTTC ( $\Delta$ 7nt, 1/10)  
 GGATCTGGG **CTGTGTGGA GACCGAG**-----TCA CTTCAATGCT ATGACCTGTG AAGCTGCAA AGGCTTCTTC ( $\Delta$ 9nt, 2/10)  
 GGATCTGGG **CTGTGTGGA GACCGAGC****GC GCCACTGCAC TCCAGCTGG GAGACAGCA GACTACATCT CA****FACTGG**CT (44nt, 1/10)

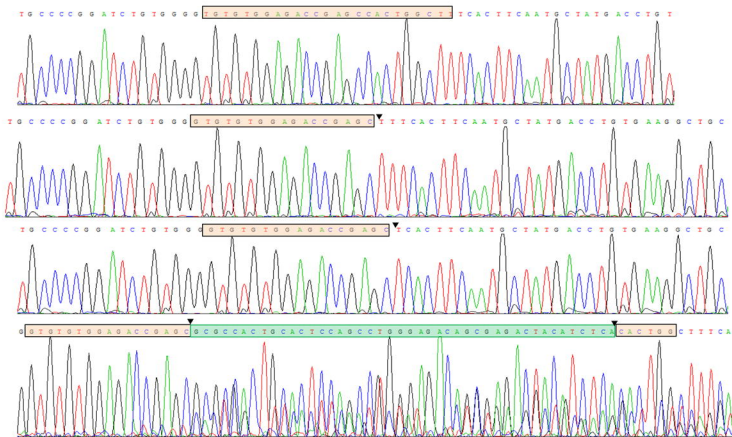

B

*Hu VDR-T2*

CTGGTCAGT **ACAGCATCCAAAAGGTCATGG**CTTTGCTAAGATGATACC (WT)  
 CTGGTCAGT **ACAGCATCCAAAAGG**---CATGGCTTTGCTAAGATGATACC ( $\Delta$ 1nt, 1/10)  
 CTGGTCAGT **ACAGCATCCAAAAGG**-----TGGCTTTGCTAAGATGATACC ( $\Delta$ 4nt, 1/10)

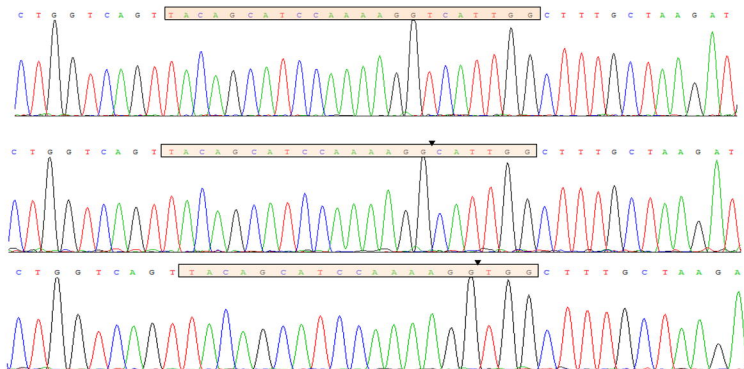

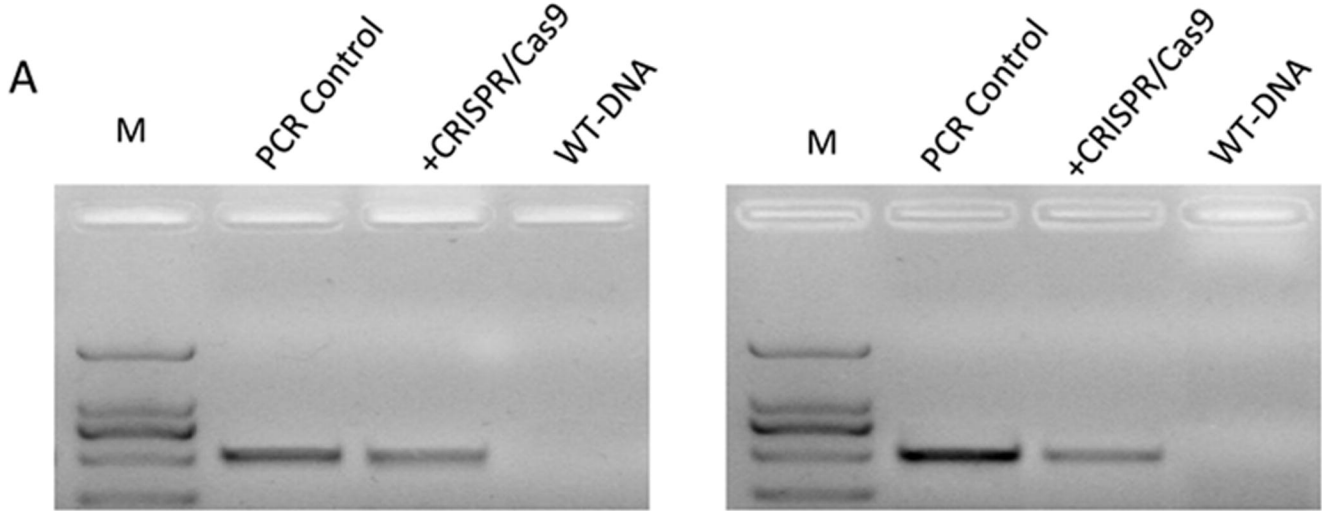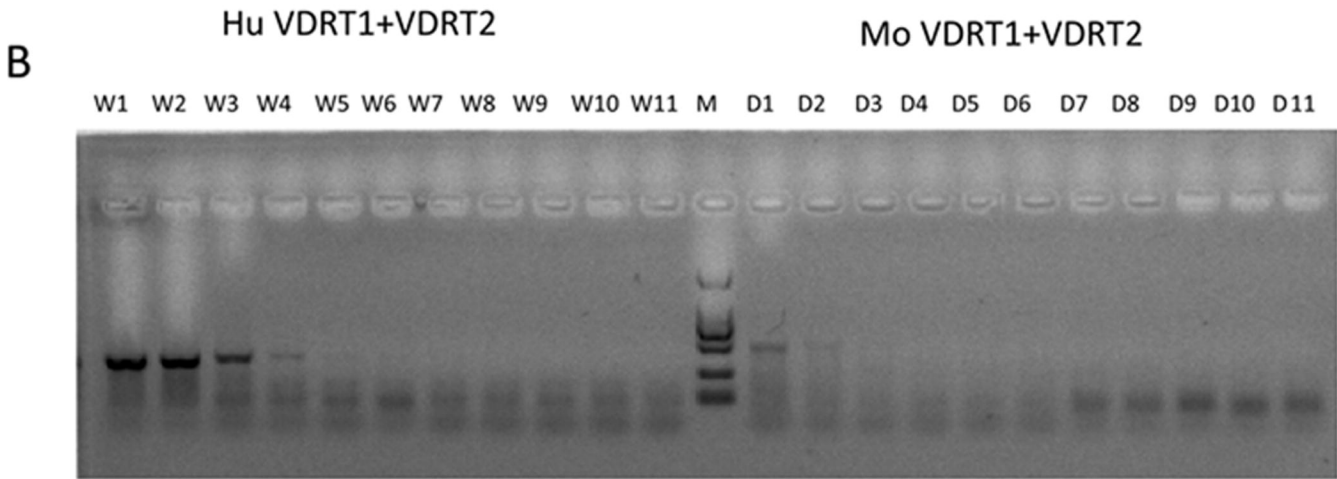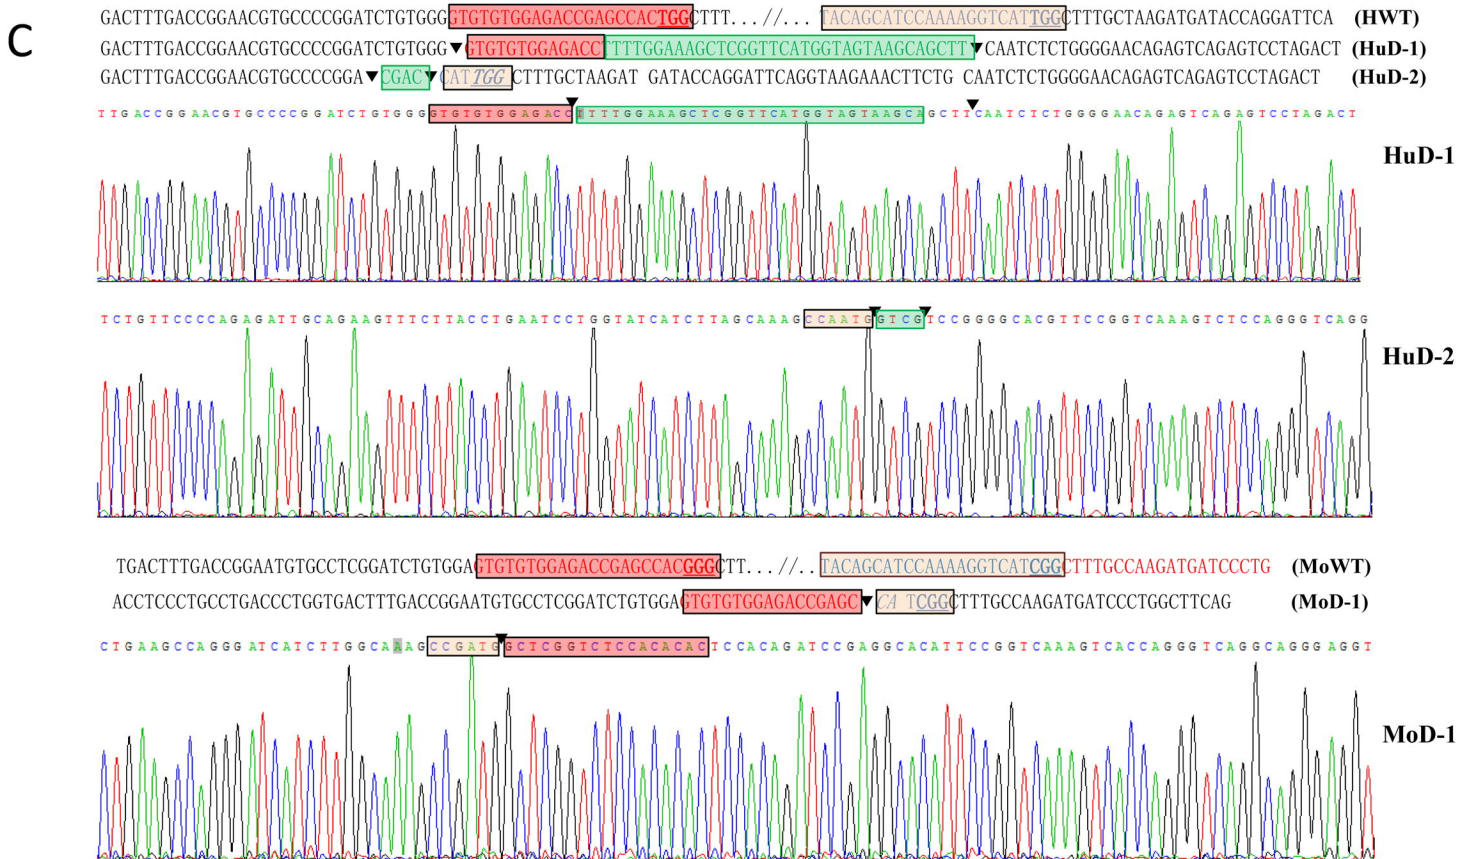

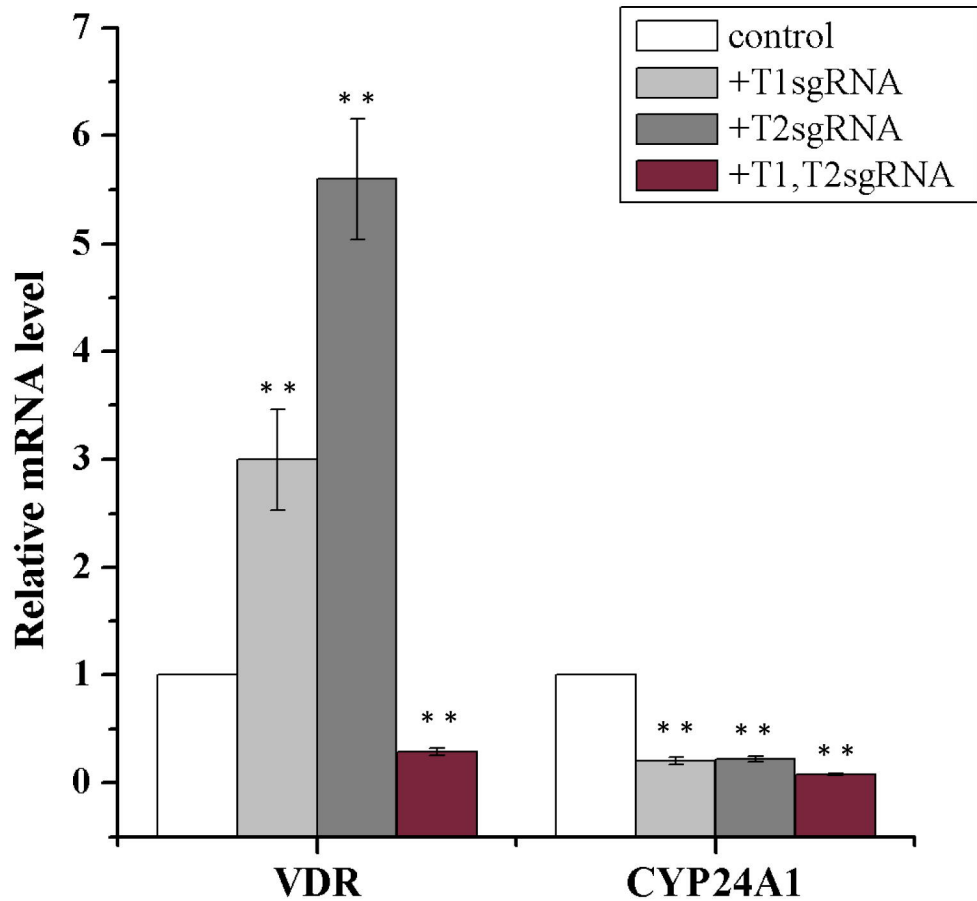



A

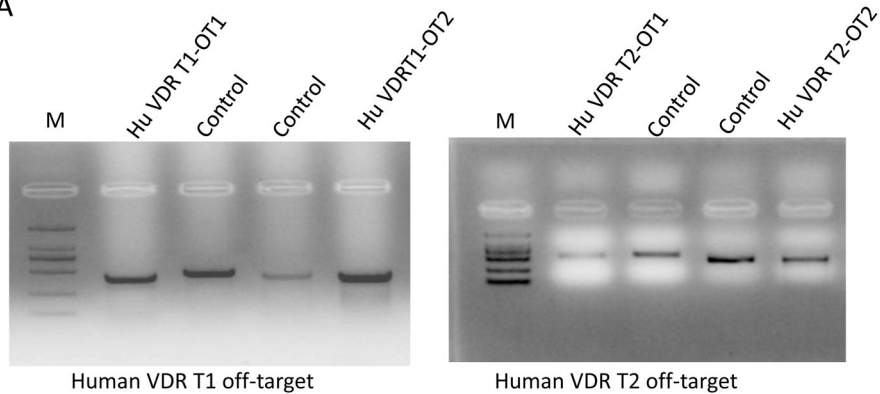

B

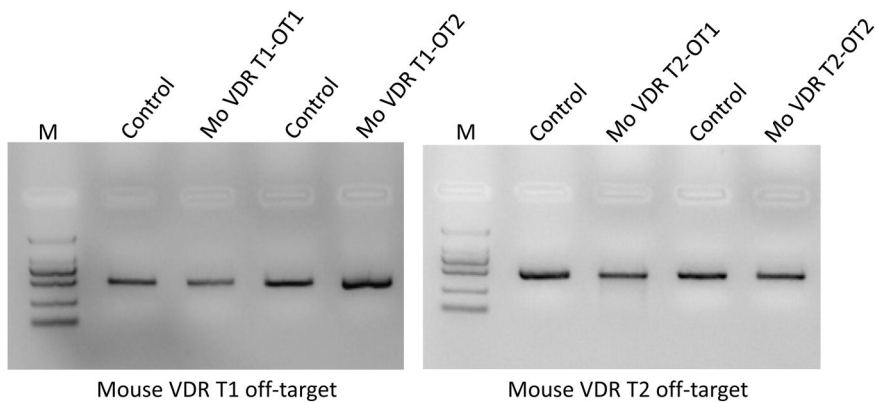

Source: http://biorxiv.org/content/10.1101/040147v1.full.pdf
